# Supplementary material for: Niobate salts of organic base catalyzed chemical fixation of carbon dioxide with epoxides to form cyclic carbonates
Source: Royal Society of Chemistry journal article supplement (doi:10.1039/c4gc02244k), 2015-01-01
Supplement: c4gc02244k1.pdf [file c4gc02244k1.pdf]

## Supporting Information

### **Niobate Salts of Organic Base Catalyzed Chemical Fixation of Carbon Dioxide with Epoxides to Form Cyclic Carbonates**

Angjun Chen, Chen Chen, Yuhe Xiu, Xuerui Liu, Jizhong Chen, Li Guo, Ran Zhang,  
Zhenshan Hou\*

Key Laboratory for Advanced Materials, Research Institute of Industrial Catalysis,  
East China University of Science and Technology, Shanghai, 200237, P. R. China.

### **Contents**

|                                                    |     |
|----------------------------------------------------|-----|
| Catalyst characterization                          | S1  |
| Reaction kinetics of propylene carbonate synthesis | S8  |
| The TGA curves of the catalyst                     | S10 |
| Spectroscopic data for the isolated products       | S12 |

## Catalyst characterization

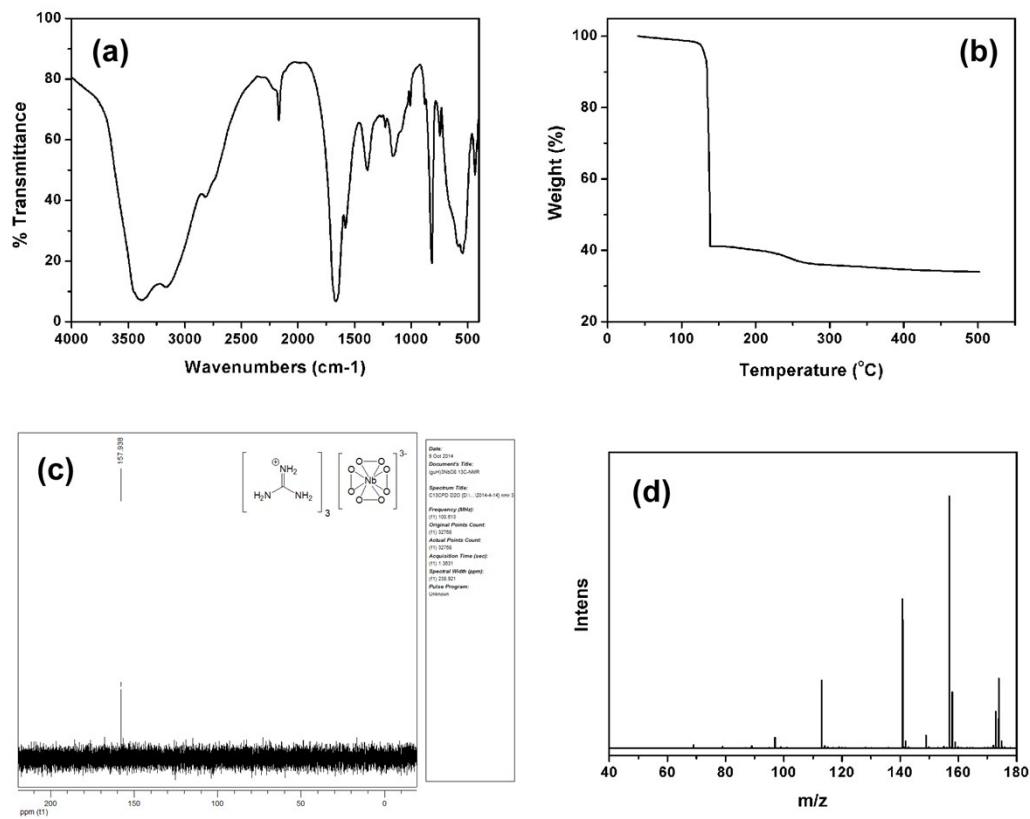

**Figure S1.** Characterization of  $(\text{guH})_3\text{NbO}_8$ : (a) FT-IR spectrum; (b) TGA pattern; (c)  $^{13}\text{C}$  NMR spectrum; (d) mass spectrum.

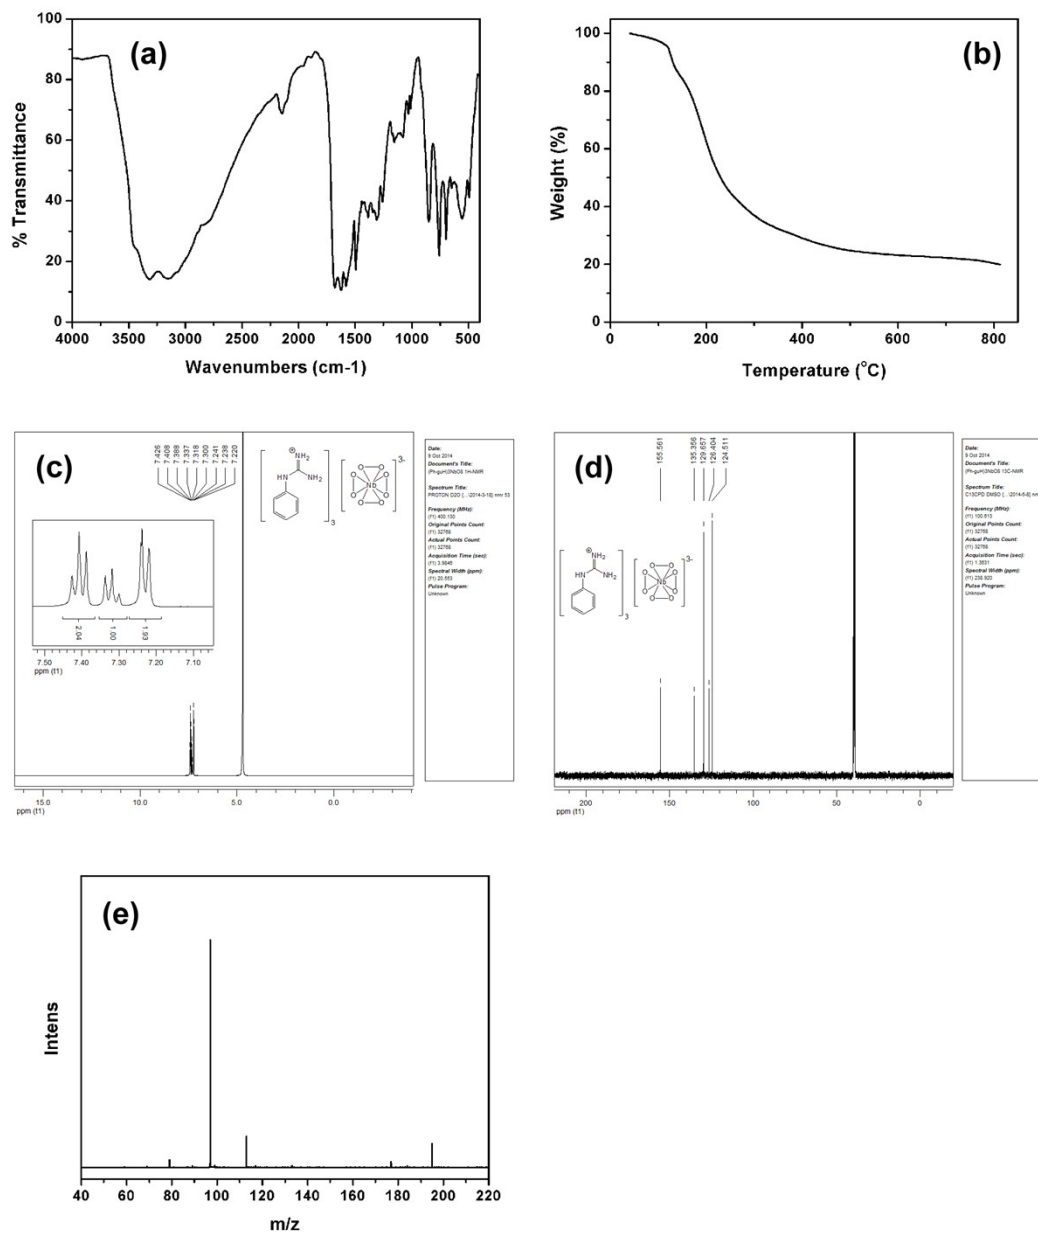

**Figure S2.** Characterization of  $(\text{Ph-guH})_3\text{NbO}_8$ : (a) FT-IR spectrum; (b) TGA pattern; (c)  $^1\text{H}$  NMR spectrum; (d)  $^{13}\text{C}$  NMR spectrum; (e) mass spectrum.

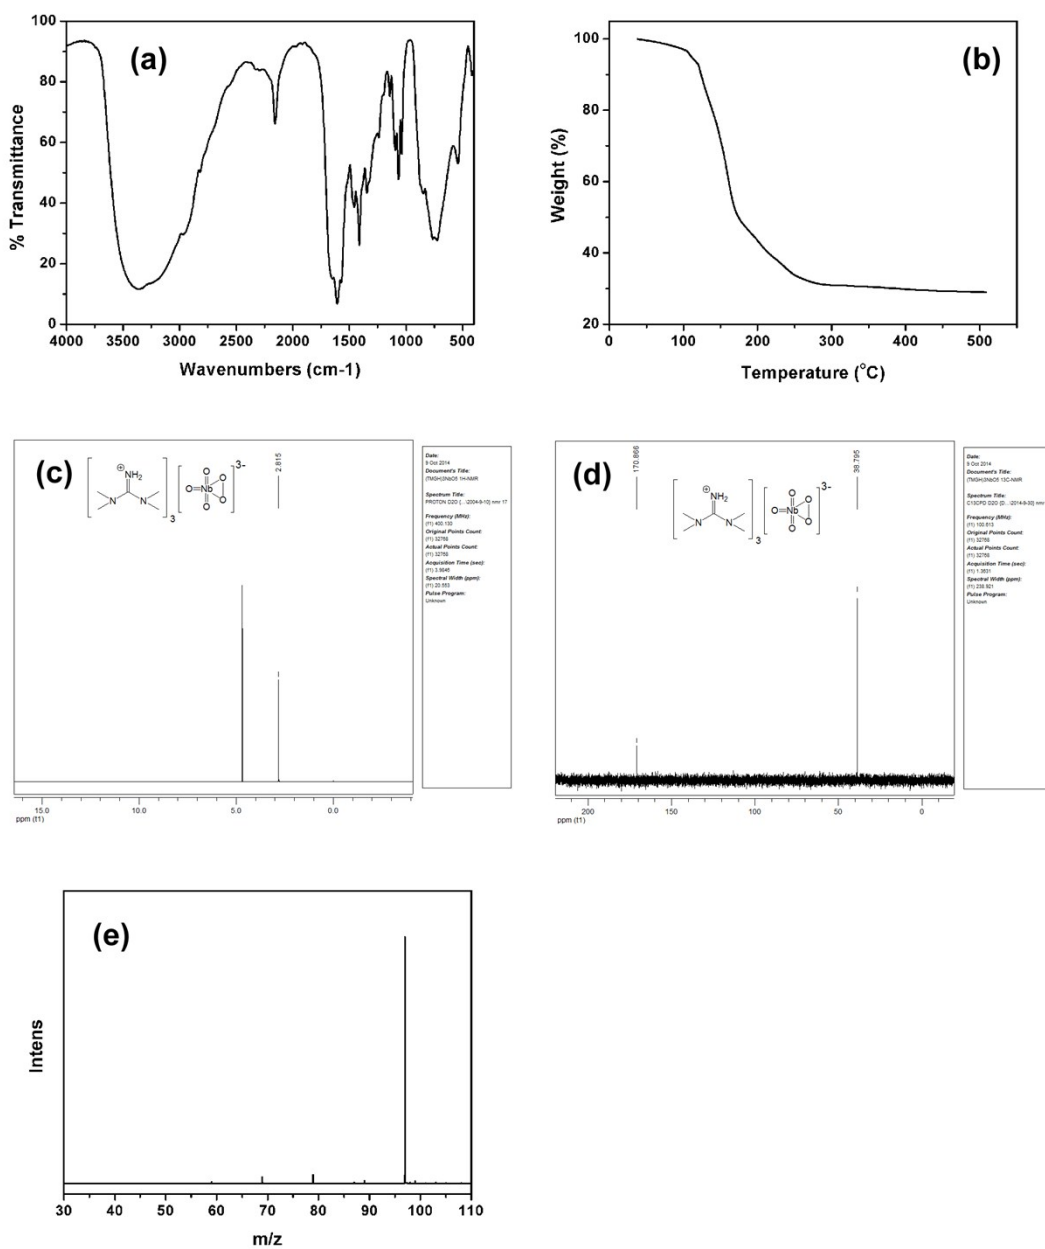

**Figure S3.** Characterization of  $(\text{TMGH})_3\text{NbO}_5$ : (a) FT-IR spectrum; (b) TGA pattern; (c)  $^1\text{H}$  NMR spectrum; (d)  $^{13}\text{C}$  NMR spectrum; (e) mass spectrum.

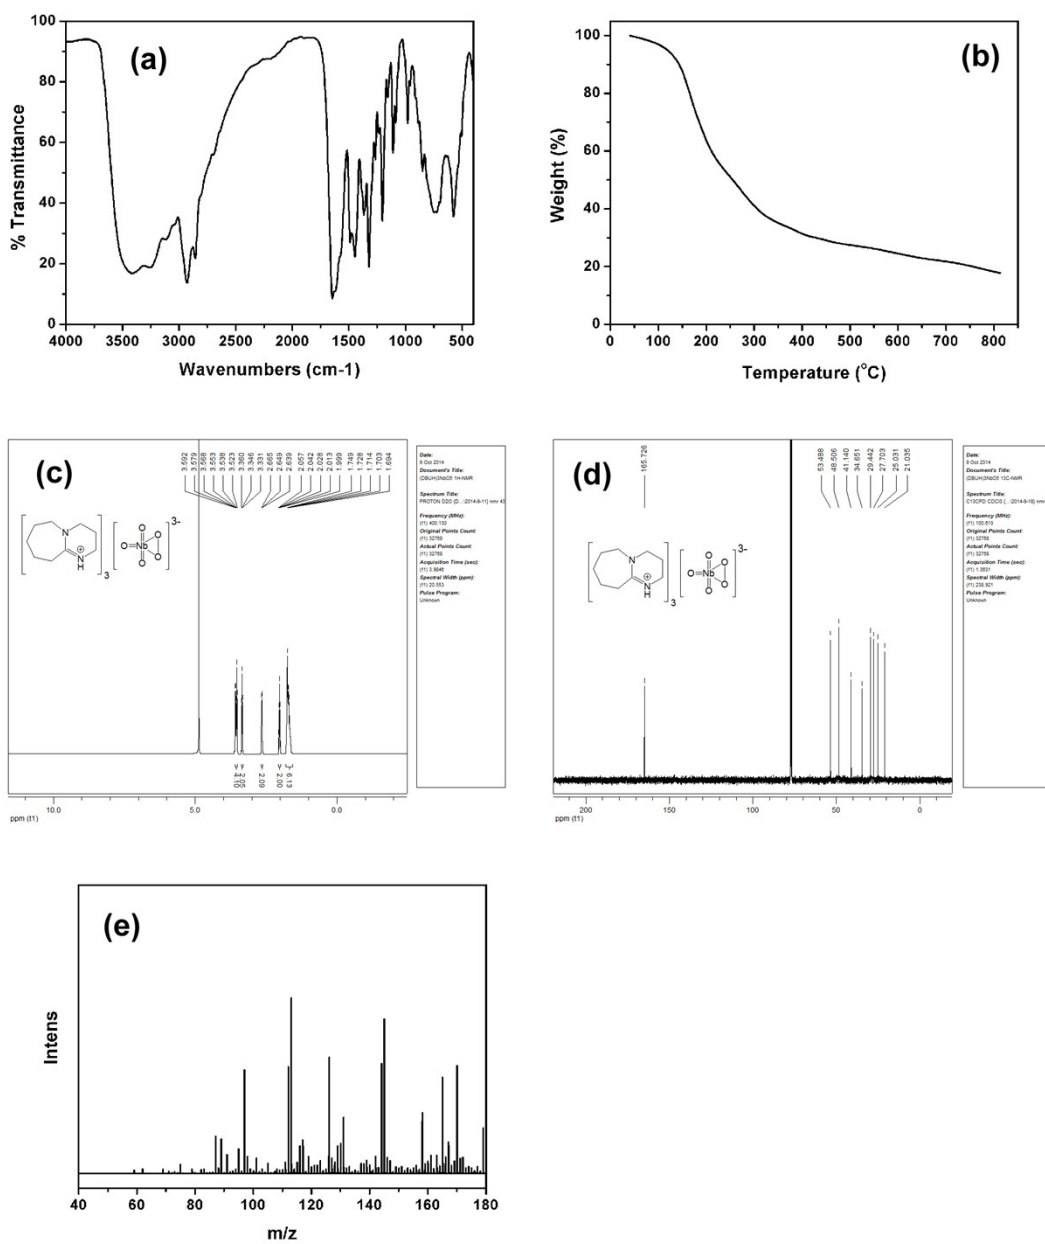

**Figure S4.** Characterization of  $(\text{DBUH})_3\text{NbO}_5$ : (a) FT-IR spectrum; (b) TGA pattern; (c)  $^1\text{H}$  NMR spectrum; (d)  $^{13}\text{C}$  NMR spectrum; (e) mass spectrum.

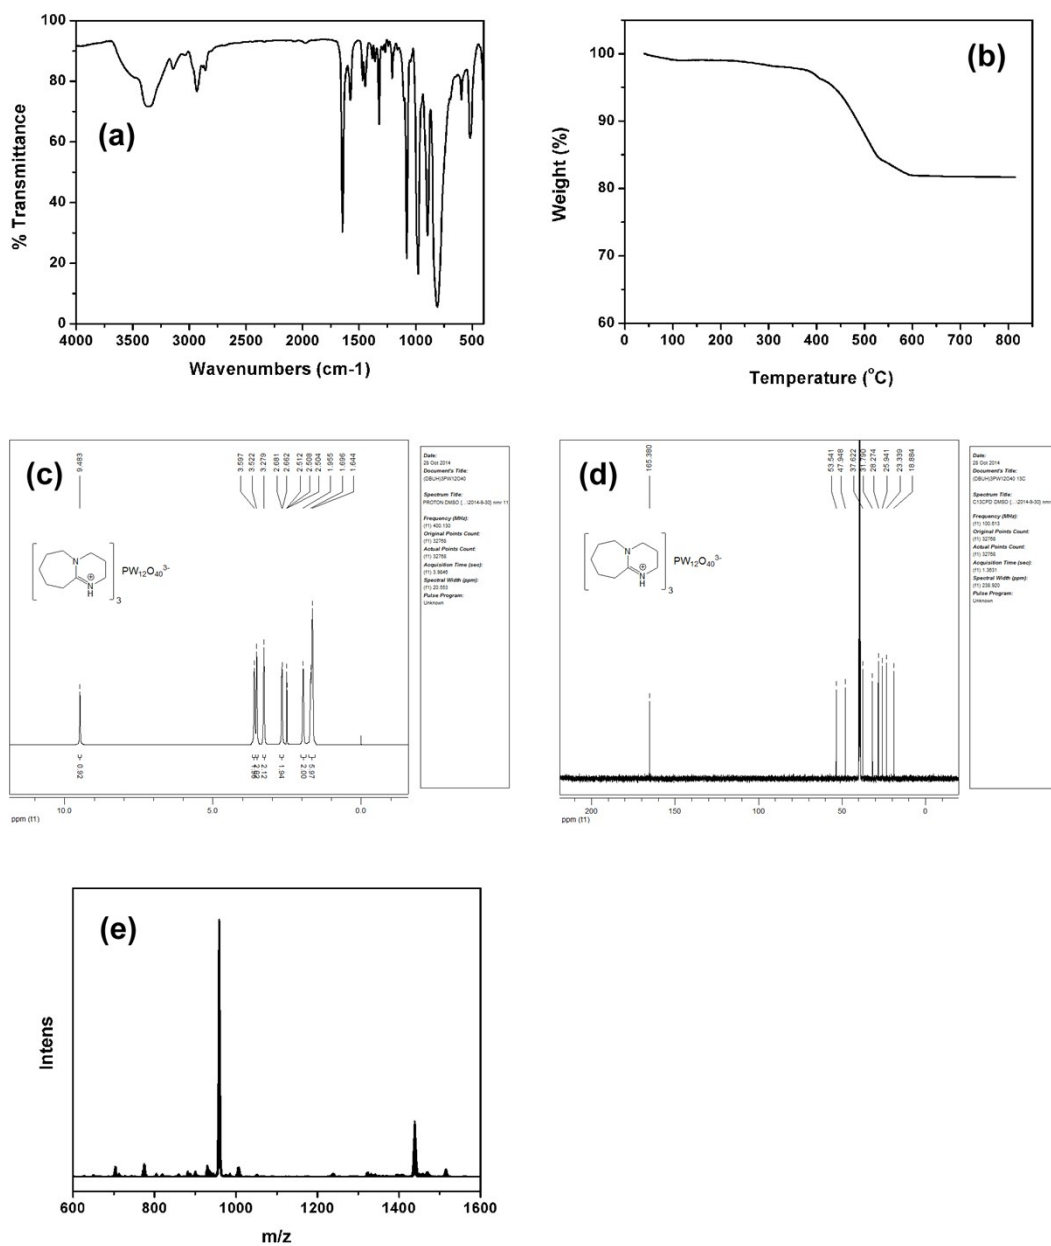

**Figure S5.** Characterization of (DBUH)<sub>3</sub>PW<sub>12</sub>O<sub>40</sub>: (a) FT-IR spectrum; (b) TGA pattern; (c) <sup>1</sup>H NMR spectrum; (d) <sup>13</sup>C NMR spectrum; (e) mass spectrum.

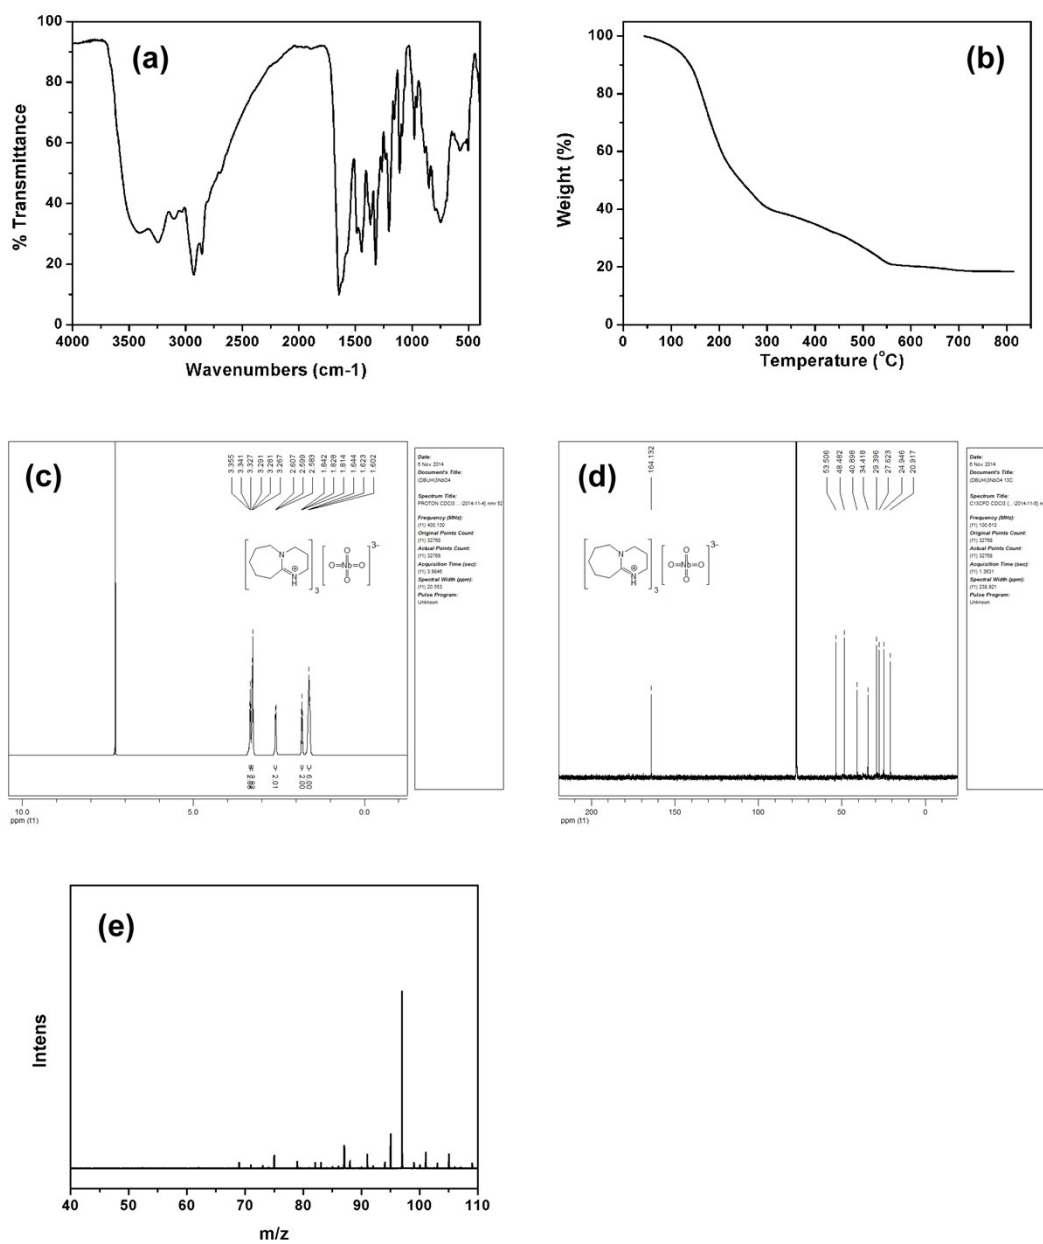

**Figure S6.** Characterization of  $(\text{DBUH})_3\text{NbO}_4$ : (a) FT-IR spectrum; (b) TGA pattern; (c)  $^1\text{H}$  NMR spectrum; (d)  $^{13}\text{C}$  NMR spectrum; (e) mass spectrum.

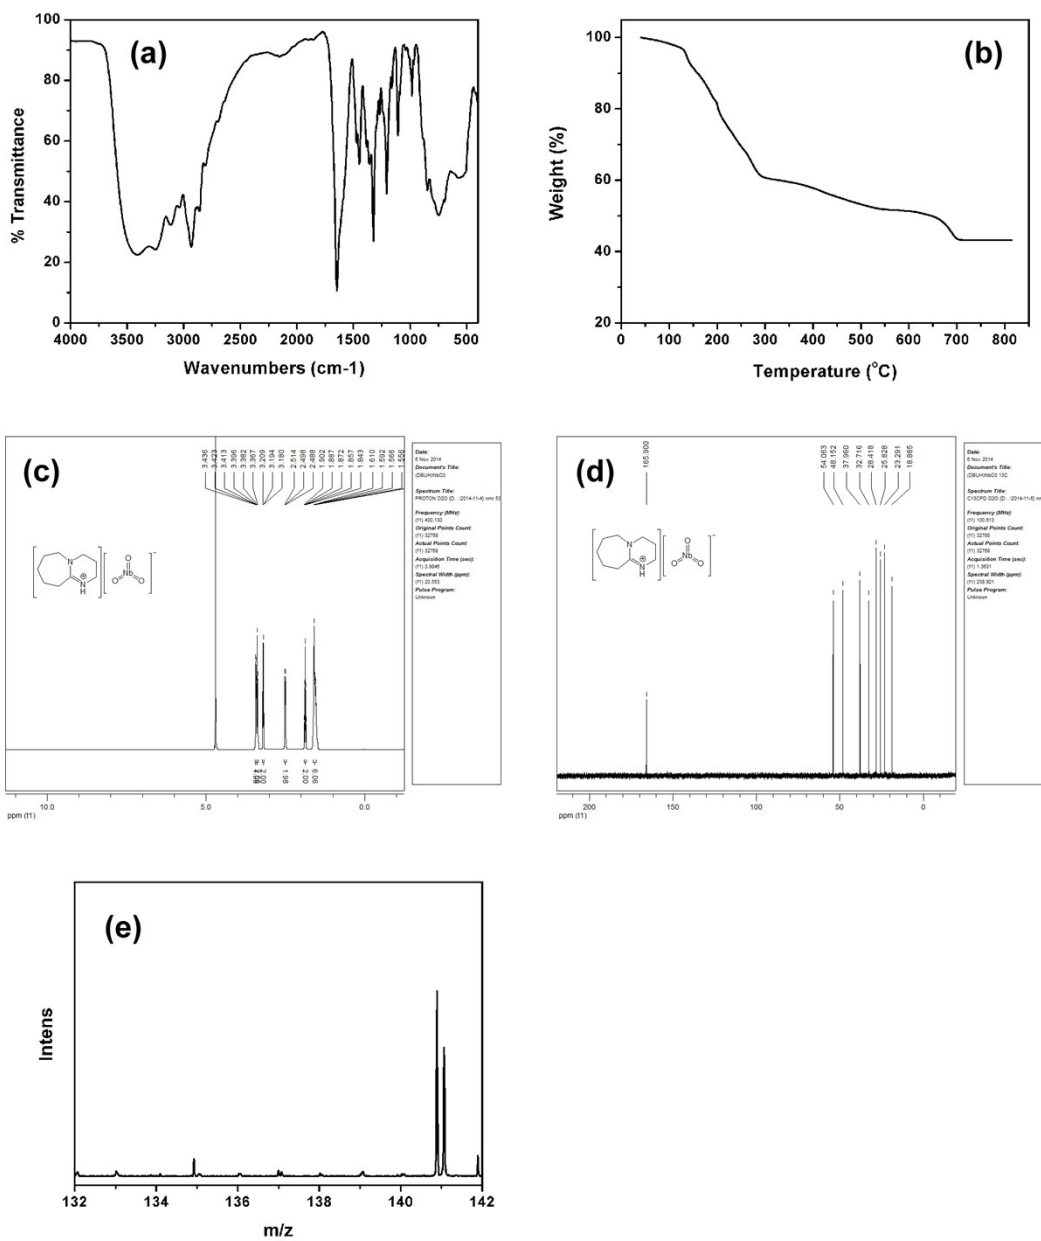

**Figure S7.** Characterization of (DBUH)NbO<sub>3</sub>: (a) FT-IR spectrum; (b) TGA pattern; (c) <sup>1</sup>H NMR spectrum; (d) <sup>13</sup>C NMR spectrum; (e) mass spectrum.



## Reaction kinetics of propylene carbonate synthesis

The procedure for investigating the kinetic parameters for the cycloaddition of carbon dioxide to propylene oxide (PO) was adapted from the literature.<sup>27</sup> PO (0.7 ml, 10 mmol), (DBUH)<sub>3</sub>NbO<sub>5</sub> (0.204 g, 0.3 mol) were loaded into an autoclave. Carbon dioxide was introduced to the reaction and kept at 3.0 MPa bar by CO<sub>2</sub> pump (DB-80, made by Beijing Satellite Manufacturing Factory). The reaction mixture was stirred vigorously using a magnetic stirrer and heated to the desired temperature (110-140°C). The reaction was monitored every 1 hour using gas chromatography. The rate constant was determined from the experimental data assuming pseudo-first order reaction kinetics and the activation energy for the process was determined using the Arrhenius equation based on the calculated rate constants at different temperatures.

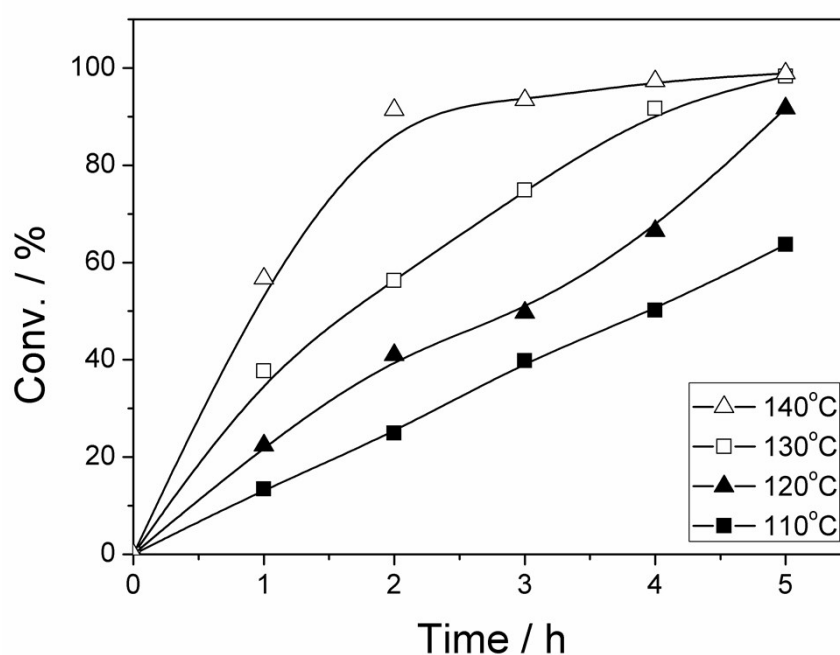

**Figure S8.** Conversion/time profiles of cycloaddition reactions catalyzed by (DBUH)<sub>3</sub>NbO<sub>5</sub> at different temperatures. Reaction conditions: PO 0.7 ml (10 mmol), (DBUH)<sub>3</sub>NbO<sub>5</sub> 0.3 mmol, 3 MPa.

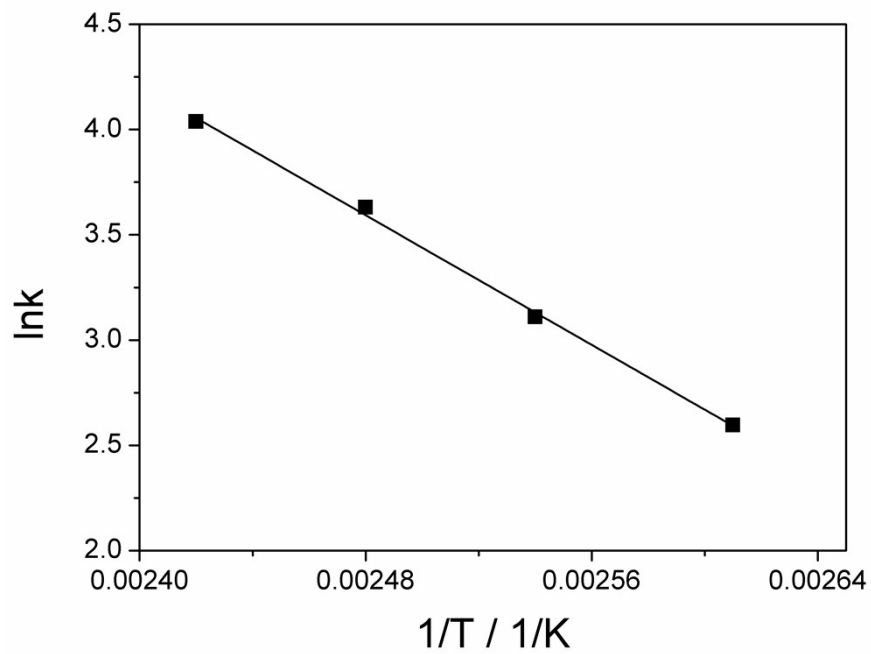

**Figure S9.** Arrhenius plots for the cycloaddition reaction of PO and carbon dioxide. The observed rate constants ( $k$ ) were calculated with the initial rates by Figure S8 at different temperatures.

## The TGA curves of the catalyst

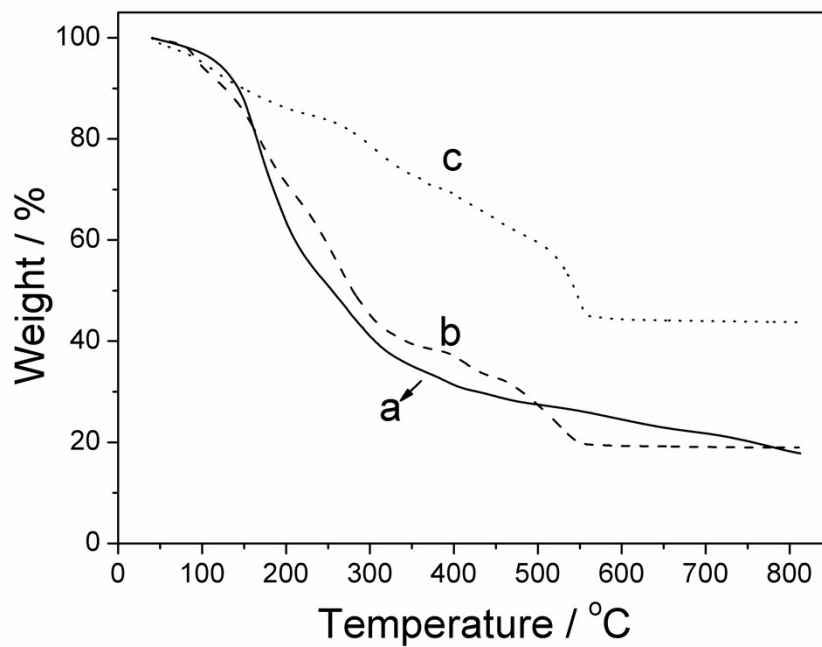

**Figure S10.** The TGA pattern of (a) fresh catalyst:  $(\text{DBUH})_3\text{NbO}_5$ ; (b) the catalyst after the first run; (c) the catalyst after the eighth run.

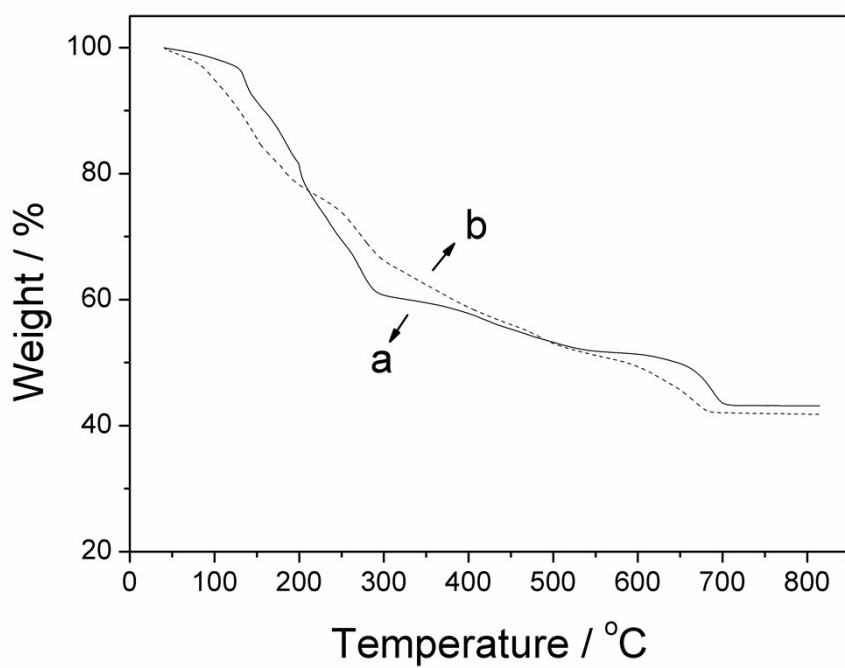

**Figure S11.** The TGA pattern of (a) fresh catalyst: (DBUH)NbO<sub>3</sub>; (b) the catalyst after the sixth run.

## Spectroscopic data for the isolated products

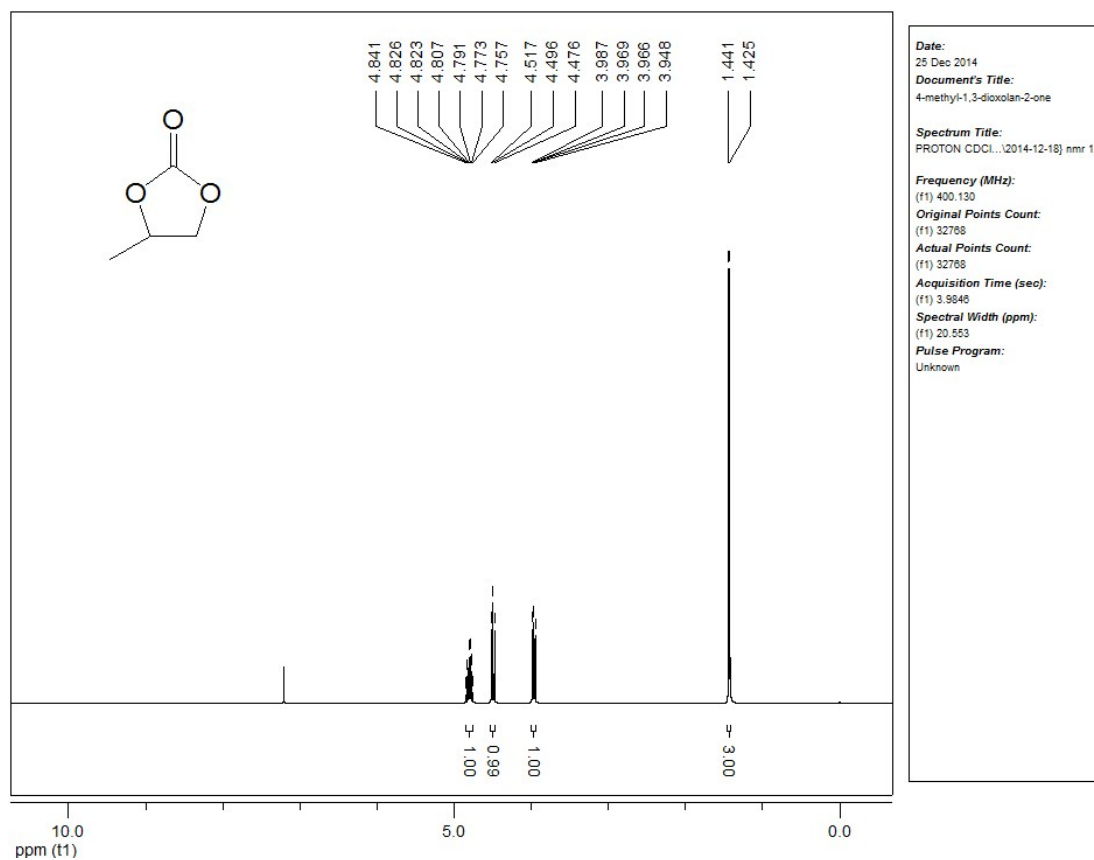

**Figure S12.**  $^1\text{H}$  NMR spectrum of 4-methyl-1,3-dioxolan-2-one.

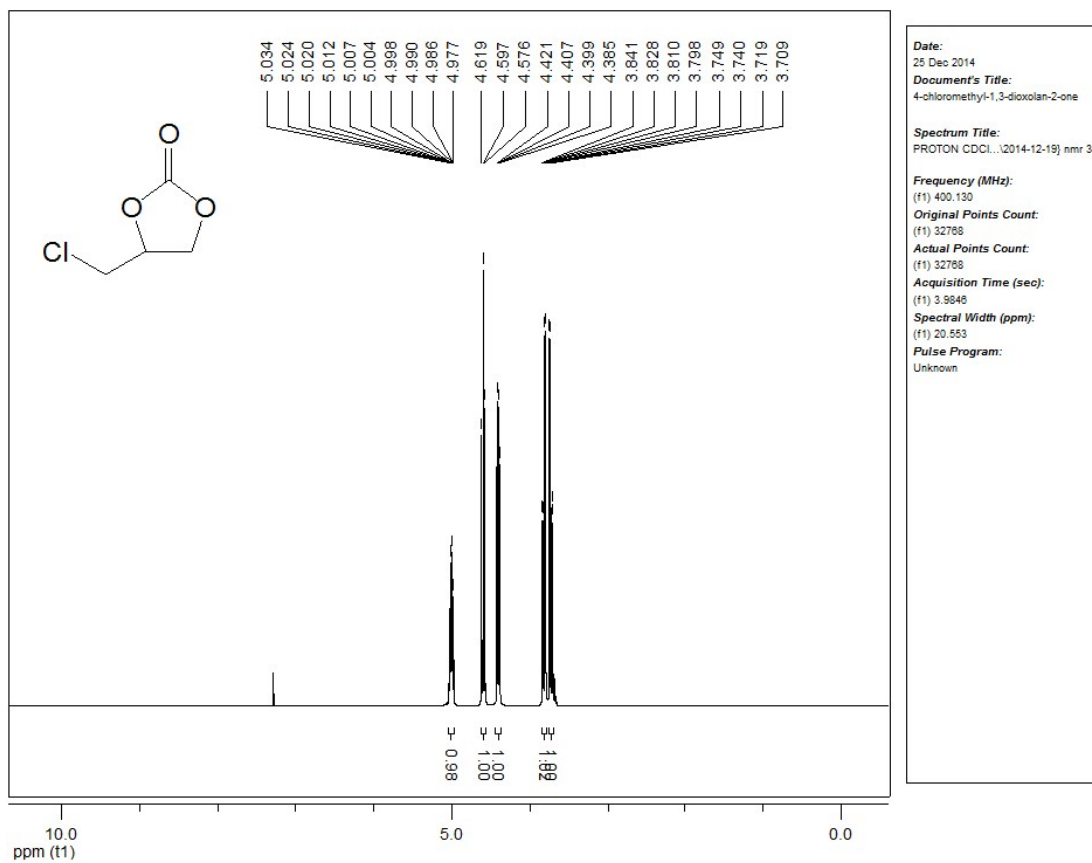

**Figure S13.** <sup>1</sup>H NMR spectrum of 4-chloromethyl-1, 3-dioxolan-2-one.

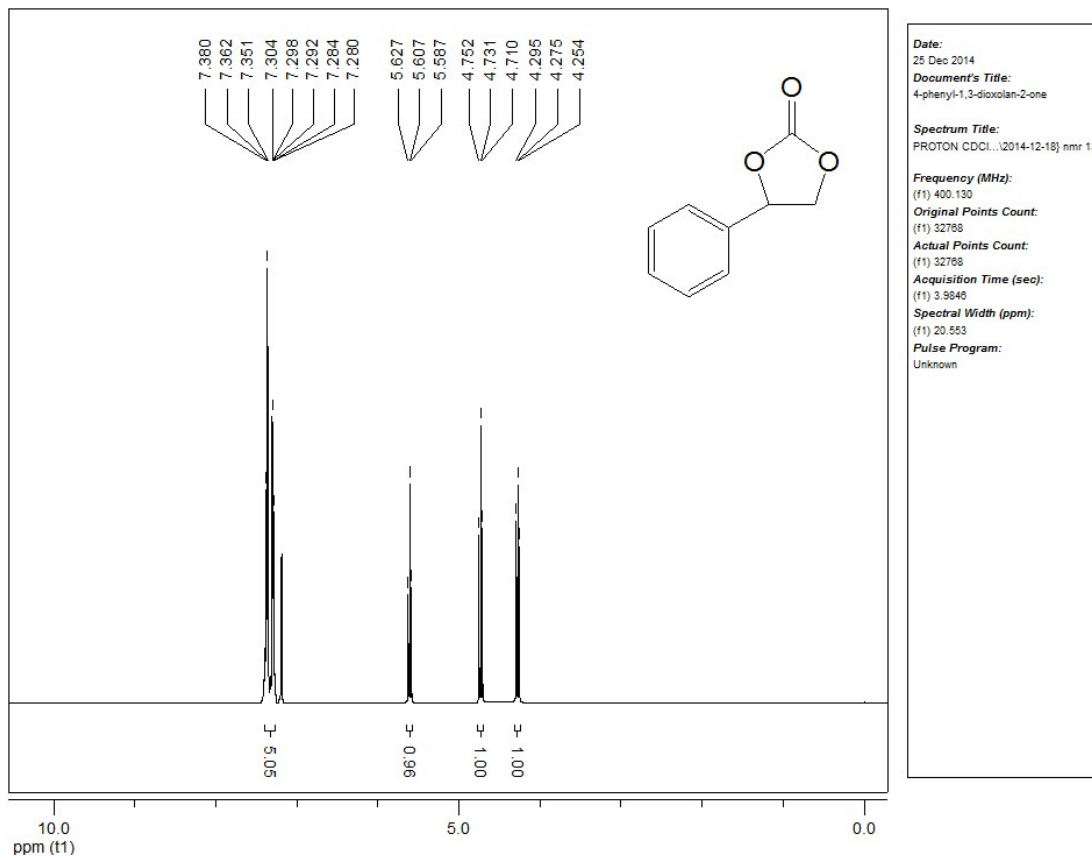

**Figure S14.**  $^1\text{H}$  NMR spectrum of 4-phenyl-1, 3-dioxolan-2-one.

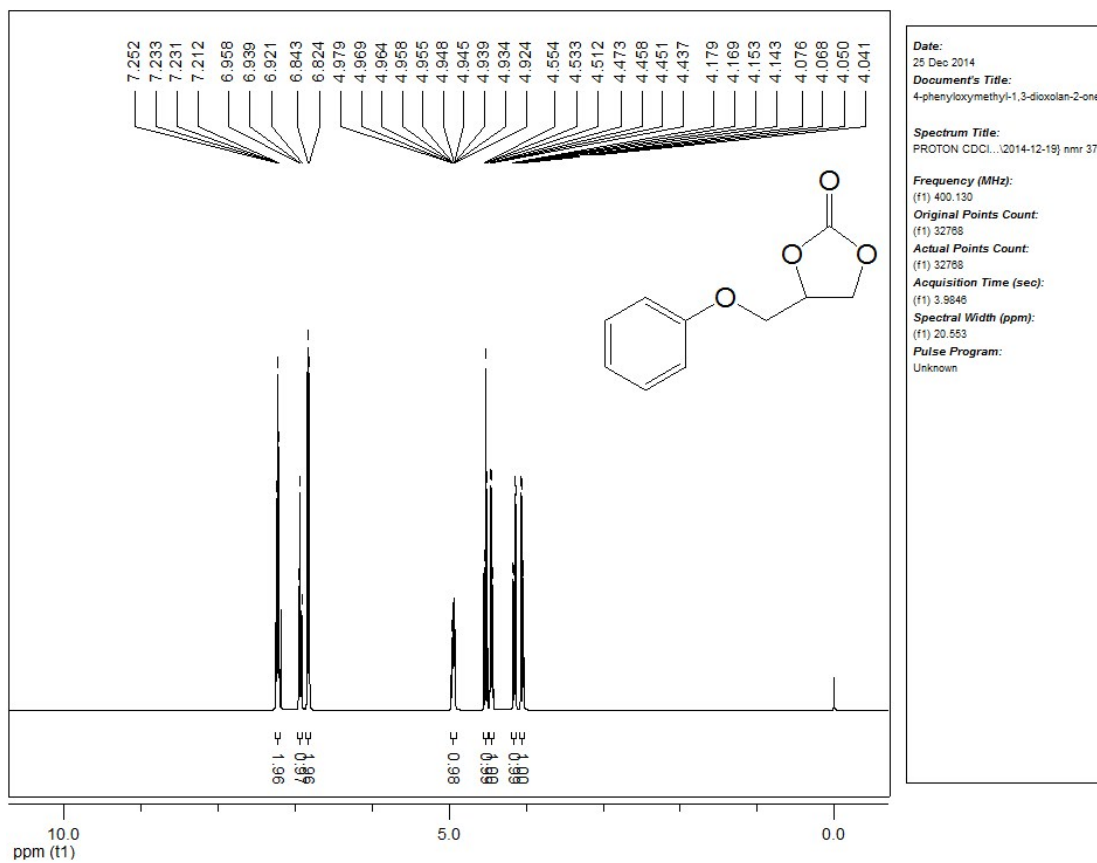

**Figure S15.**  $^1\text{H}$  NMR spectrum of 4-phenyloxymethyl-1, 3-dioxolan-2-one.



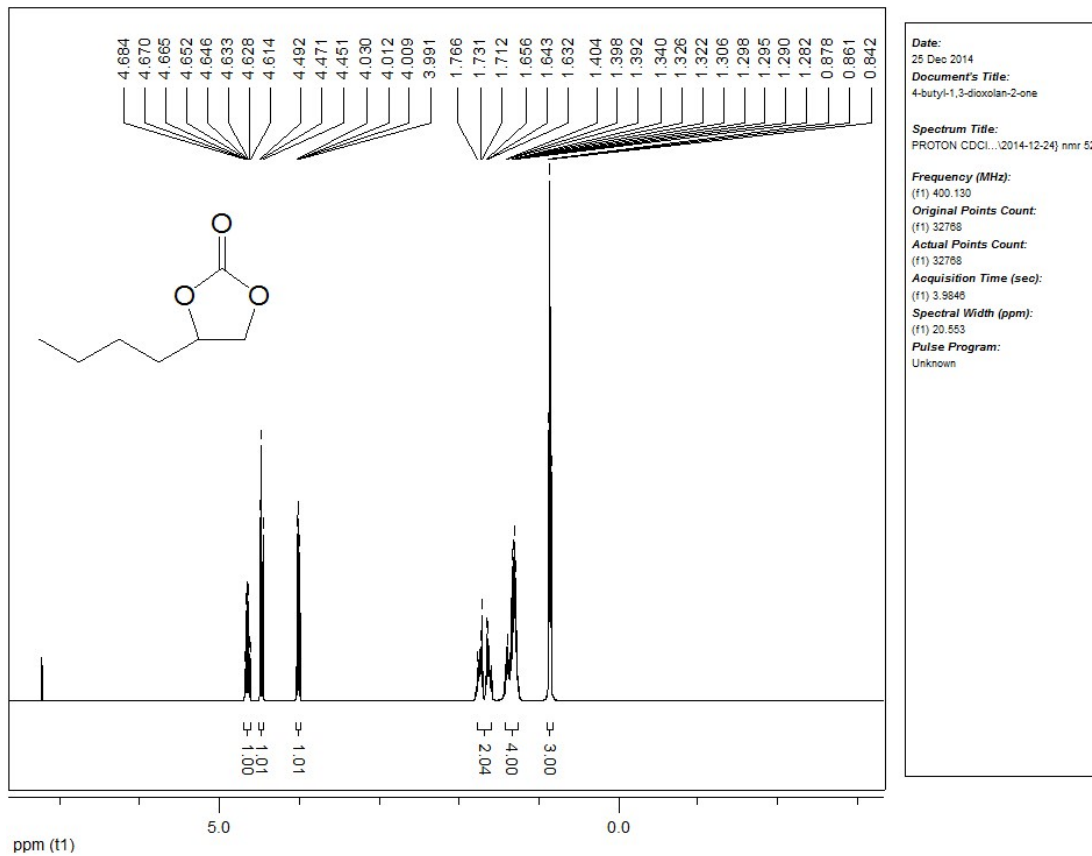

**Figure S16.**  $^1\text{H}$  NMR spectrum of 4-butyl-1, 3-dioxolan-2-one.

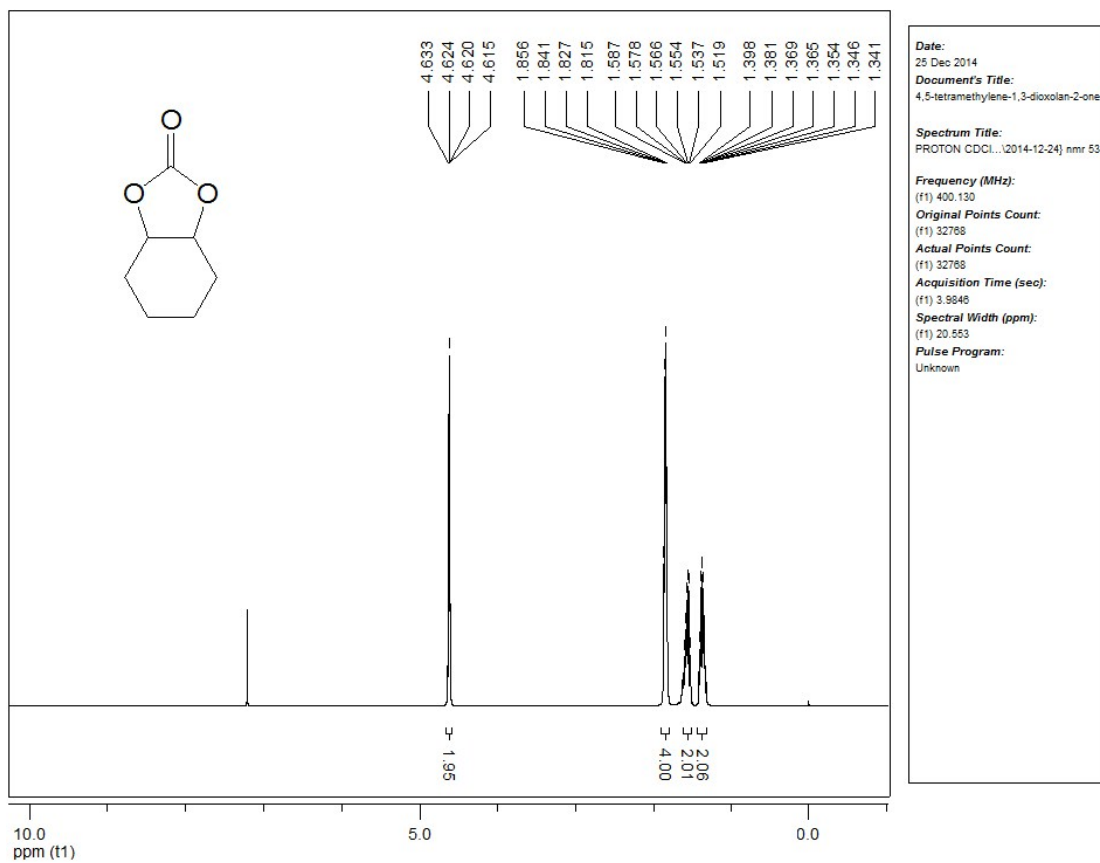

**Figure S17.**  $^1\text{H}$  NMR spectrum of 4,5-tetramethylene-1,3-dioxolan-2-one.
